# Supplementary material
Source: Springer Nature journal article supplement (https://www.springermedizin.de/resource/supplementary/12991_2008_989_MOESM1_ESM.pdf/9615522)
Supplement: MOESM1 [file 9615522]

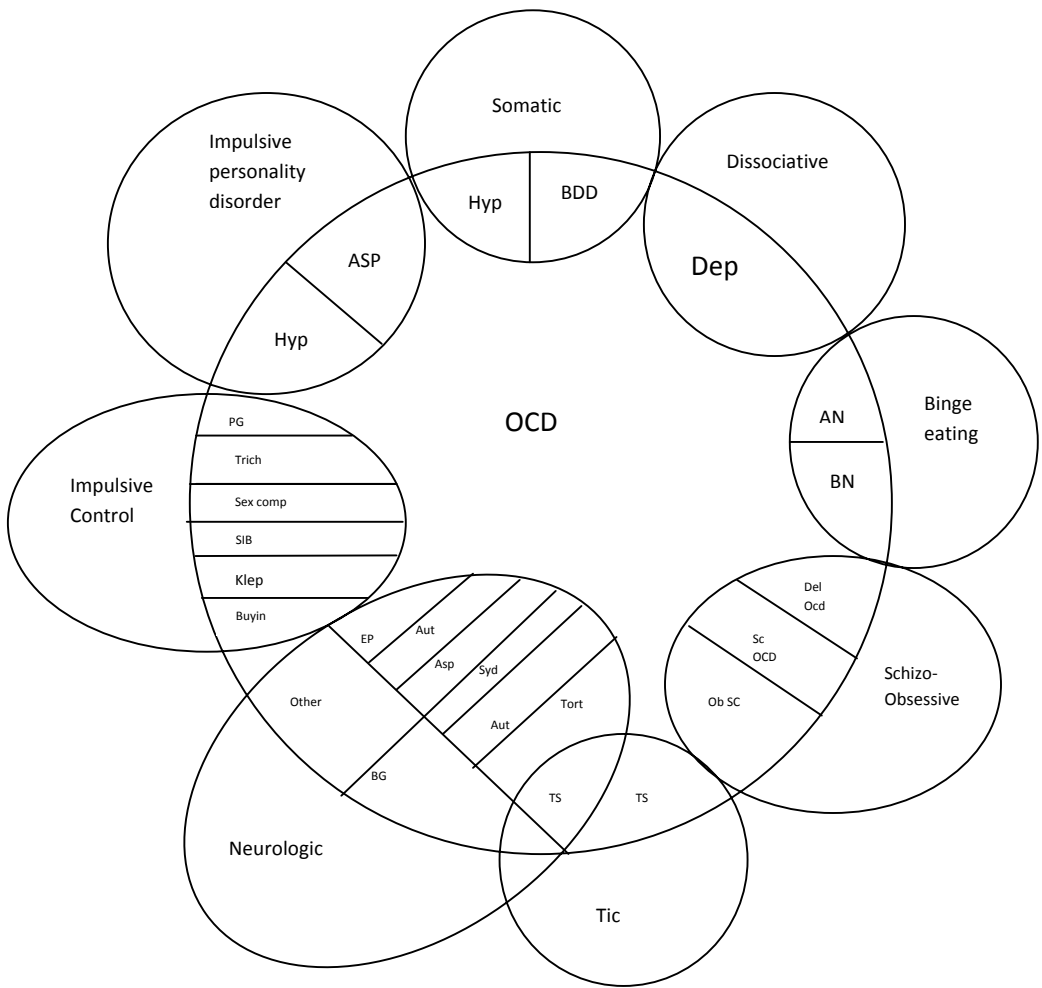

AN: anorexia nervosa

Ep: epilepsy

Tort: torticollis

Asp: Asperger's syndrome

Hyp: hypochondriasis

Trich: trichotillomania

ASPD: antisocial personality disorder

Klept: kleptomania

TS: Tourette's syndrome

Aut: autism

Ob Sc: schizo-obsessive

BN: bulimia

PG: pathological gambling

BG: basal ganglia disorder

Sc OCD: schizotypal OCD

BDD: body dysmorphic disorder

Sex Comp: sexual compulsions

Del OCD: delusional OCD

SIB: self-injurious behaviour

Dep: depersonalization Disorder

Syd: Sydenham's chorea
